# Supplementary material for: Signal amplification in molecular imaging by pretargeting a multivalent, bispecific antibody
Source: Springer Nature journal article supplement (doi:10.1038/nm1322), 2005-10-30
Supplement: 41591_2005_BFnm1322_MOESM2_ESM.pdf [file 41591_2005_BFnm1322_MOESM2_ESM.pdf]

A

Polypeptide

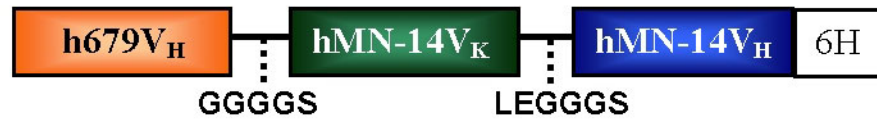

Polypeptide

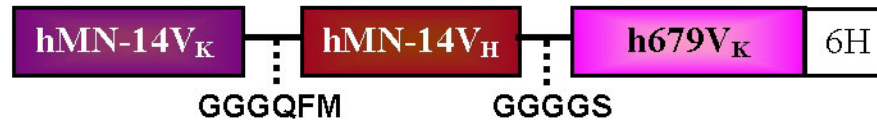

B

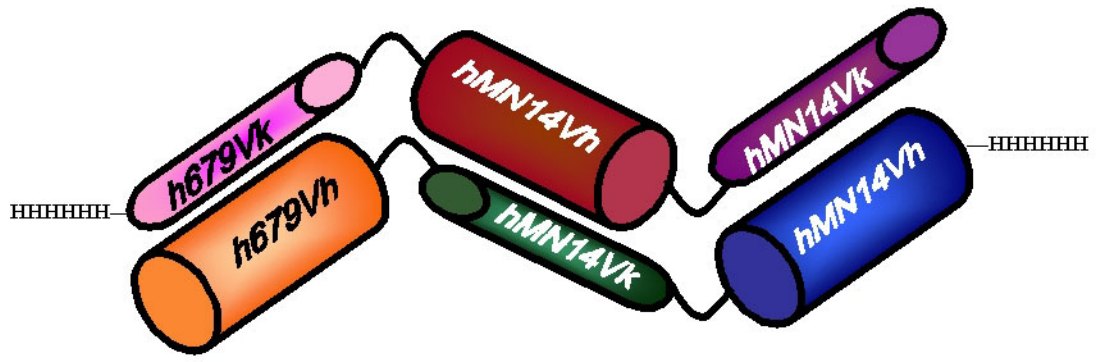

h679/HSG

CEA/hMN-14

CEA/hMN-14

**79.5 kDa heterodimer**

**Figure S2. Schematic representation of the two polypeptides that are synthesized from the hBS14-pdHL2 vector (A) that form the anti-CEA x anti-HSG bispecific antibody (B).**
