# Supplementary material for: Signal amplification in molecular imaging by pretargeting a multivalent, bispecific antibody
Source: Springer Nature journal article supplement (doi:10.1038/nm1322), 2005-10-30
Supplement: 41591_2005_BFnm1322_MOESM3_ESM.pdf [file 41591_2005_BFnm1322_MOESM3_ESM.pdf]

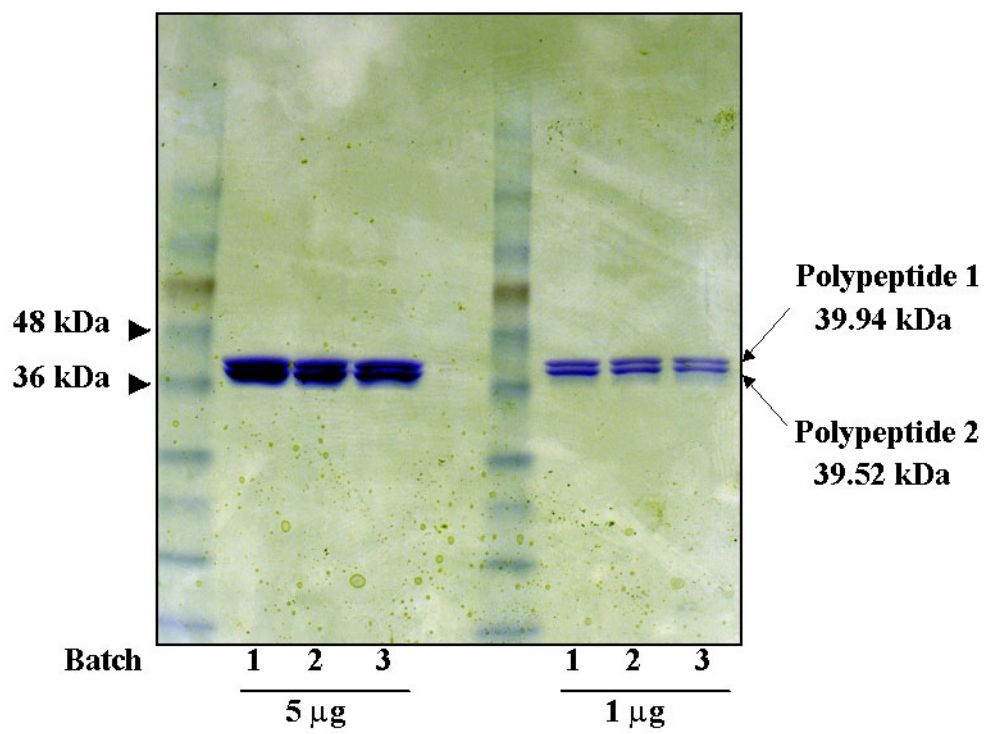

**Figure 3S.** SDS-PAGE analysis of 3 batches of hBS14 following single-step purification with Affigel-IMP-291 affinity chromatography. The calculated molecular weights, obtained from the deduced amino acid sequences of hBS14 polypeptides 1 and 2 are given and arrows indicate their gel positions.
