# Supplementary material for: Signal amplification in molecular imaging by pretargeting a multivalent, bispecific antibody
Source: Springer Nature journal article supplement (doi:10.1038/nm1322), 2005-10-30
Supplement: 41591_2005_BFnm1322_MOESM4_ESM.pdf [file 41591_2005_BFnm1322_MOESM4_ESM.pdf]

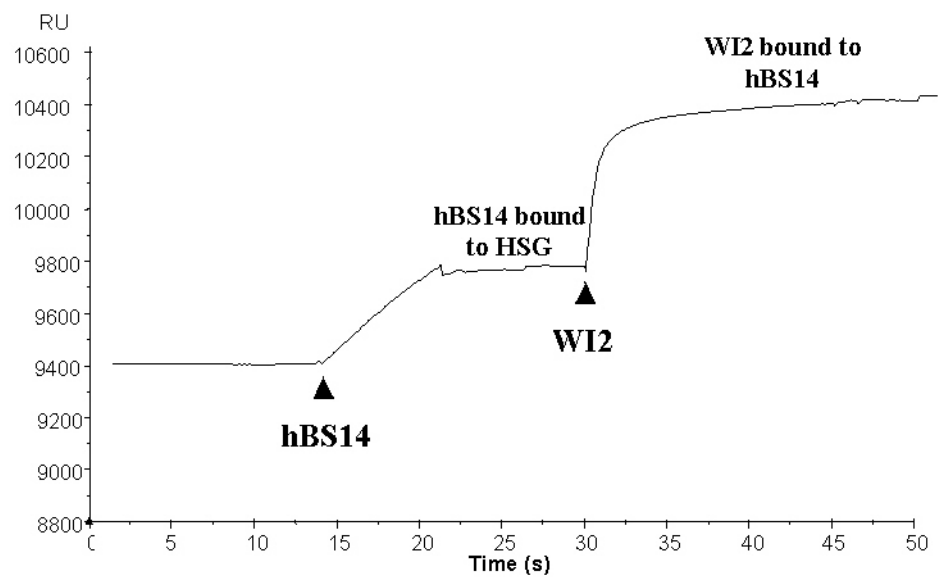

**Figure 4S.** BIAcore sensorgram showing simultaneous HSG and CEA binding for hBS14 multivalent bsMAb, confirming dual specificity of the bsMAb. hBS14 (50 ng) was loaded on a high-density HSG-coupled (IMP-239) sensor chip and then WI2 (2 g) was allowed to bind to the immobilized hBS14. Arrows indicate injection times. (RU, resonance units)
