# Supplementary material for: Signal amplification in molecular imaging by pretargeting a multivalent, bispecific antibody
Source: Springer Nature journal article supplement (doi:10.1038/nm1322), 2005-10-30
Supplement: 41591_2005_BFnm1322_MOESM5_ESM.pdf [file 41591_2005_BFnm1322_MOESM5_ESM.pdf]

**IMP-245: DOTA-Phe-Lys(HSG)-D-Tyr-Lys(HSG)-Lys(Tscg-Cys)-NH<sub>2</sub>**

Where HSG is histamine-succinyl-glycine,

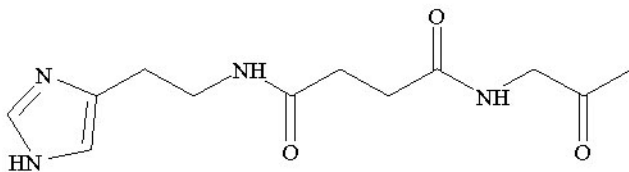

and DOTA is 1,4,7,10-tetraazacyclodecane-*N, N', N'', N'''*-tetraacetic acid

TscgC is thiosemicarbazonyl-glyoxyl-cysteiny-

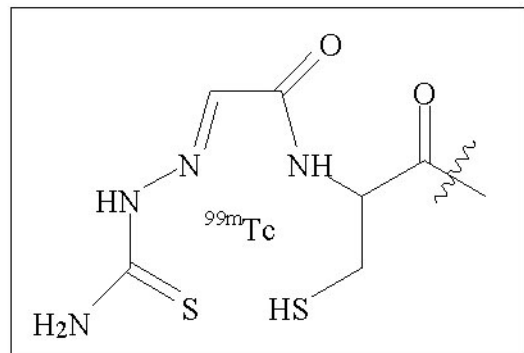

**Figure 5S.**  $^{99m}\text{Tc}$ -IMP-245 bivalent HSG peptide used as the radiotracer for these studies.
