# Supplementary material for: Signal amplification in molecular imaging by pretargeting a multivalent, bispecific antibody
Source: Springer Nature journal article supplement (doi:10.1038/nm1322), 2005-10-30
Supplement: 41591_2005_BFnm1322_MOESM6_ESM.pdf [file 41591_2005_BFnm1322_MOESM6_ESM.pdf]

**Table S1.** The effect of adjusting the bsMAb dose and interval on the uptake of <sup>99m</sup>Tc-radiotracer in the tumor and blood. Values represent the means ± SD in 4 animals. Tumor-bearing animals were given 0.5 g (6.25 pmoles) or 5 g (62.5 pmoles) of the bsMAb with 3.6 nmoles of the radiotracer administered 24 h later, and 2 other groups were given 6.25 pmoles of the bsMAb, but with the interval reduced to 8 h and the radiotracer dose adjusted to either 3.6 or 0.625 pmoles.

| pmole |             | Interval (h) | bsMAb/<br>radiotracer mole<br>ratio | <sup>125</sup> I-bsMAb |             | <sup>99m</sup> Tc-radiotracer |           | Tumor/<br>blood ratio |
|-------|-------------|--------------|-------------------------------------|------------------------|-------------|-------------------------------|-----------|-----------------------|
| bsMAb | Radiotracer |              |                                     | % ID/g                 |             | % ID/g                        |           |                       |
|       |             |              |                                     | Tumor                  | Blood       | Tumor                         | Blood     |                       |
| 62.5  | 3.6         | 24           | 17:1                                | 4.6 ± 0.4              | 0.54 ± 0.03 | 17.0 ± 7.8                    | 2.1 ± 0.3 | 8.2 ± 3.4             |
| 6.25  | 3.6         | 24           | 1.7:1                               | 4.9 ± 2.9              | 0.58 ± 0.06 | 3.7 ± 2.4                     | 1.1 ± 0.3 | 3.5 ± 2.1             |
| 6.25  | 3.6         | 8            | 1.7:1                               | 6.3 ± 0.7              | 4.5 ± 1.0   | 4.2 ± 0.7                     | 2.4 ± 0.7 | 1.8 ± 0.5             |
| 6.25  | 0.625       | 8            | 10:1                                | 6.5 ± 1.1              | 5.3 ± 0.7   | 6.4 ± 2.0                     | 4.1 ± 0.7 | 1.6 ± 0.5             |
