# Supplementary material for: Signal amplification in molecular imaging by pretargeting a multivalent, bispecific antibody
Source: Springer Nature journal article supplement (doi:10.1038/nm1322), 2005-10-30
Supplement: 41591_2005_BFnm1322_MOESM7_ESM.pdf [file 41591_2005_BFnm1322_MOESM7_ESM.pdf]

**Table 2S.** Biodistribution of  $^{99m}\text{Tc}$ -radiotracer in nude mice bearing GW-39 tumors that were given 500 pmoles of the di-bsMAb followed 24 h later with 50 pmoles (32 Ci) of the  $^{99m}\text{Tc}$ -radiotracer. Values represent the mean  $\pm$  SD.

|                      | <b>1 hour (n = 4)</b>                 |                  |
|----------------------|---------------------------------------|------------------|
|                      | %ID/g                                 | T/NT             |
| Tumor<br>(weight; g) | $25.9 \pm 2.0$<br>( $0.18 \pm 0.04$ ) | ----             |
| Liver                | $0.98 \pm 0.04$                       | $26.5 \pm 2.7$   |
| Spleen               | $0.44 \pm 0.05$                       | $59.9 \pm 10.3$  |
| Kidney               | $5.23 \pm 0.39$                       | $5.0 \pm 0.5$    |
| Lungs                | $1.70 \pm 0.33$                       | $15.8 \pm 3.7$   |
| Blood                | $2.98 \pm 0.36$                       | $8.8 \pm 1.6$    |
| Stomach              | $1.07 \pm 0.22$                       | $25.1 \pm 5.5$   |
| Sm Intestine         | $1.64 \pm 0.30$                       | $16.0 \pm 1.7$   |
| Lg Intestine         | $0.29 \pm 0.03$                       | $89.5 \pm 16.0$  |
|                      | <b>24 h (n = 4)</b>                   |                  |
| Tumor<br>(weight)    | $17.6 \pm 3.2$<br>( $0.27 \pm 0.14$ ) | ----             |
| Liver                | $0.24 \pm 0.05$                       | $73.7 \pm 2.3$   |
| Spleen               | $0.14 \pm 0.01$                       | $123.4 \pm 12.3$ |
| Kidney               | $1.54 \pm 0.18$                       | $11.5 \pm 1.8$   |
| Lungs                | $0.47 \pm 0.44$                       | $542 \pm 23.4$   |
| Blood                | $0.18 \pm 0.02$                       | $98.6 \pm 11.6$  |
| Stomach              | $0.36 \pm 0.30$                       | $99.4 \pm 110.0$ |
| Sm Intestine         | $0.21 \pm 0.05$                       | $88.1 \pm 25.6$  |
| Lg Intestine         | $0.40 \pm 0.13$                       | $46.4 \pm 13.1$  |
